# Supplementary material
Source: PubMed Central journal article supplement (PMC7306117)
Supplement: NIHMS1565227-supplement-Supplement1.pdf [file NIHMS1565227-supplement-Supplement1.pdf]

## Supplementary Appendix

This appendix has been provided by the authors to give readers additional information about their work.

Supplement to: The National Heart, Lung, and Blood Institute PETAL Clinical Trials Network. Early high-dose vitamin D<sub>3</sub> for critically ill, vitamin D–deficient patients. *N Engl J Med* 2019;381:2529-40. DOI: 10.1056/NEJMoa1911124

# **Early High Dose Vitamin D<sub>3</sub> for Critically Ill Patients with Vitamin D Deficiency**

## **Supplementary Materials**

# Table of Contents

---

|                                                                                                                              |           |
|------------------------------------------------------------------------------------------------------------------------------|-----------|
| Collaborators.....                                                                                                           | 3         |
| <b>Vitamin D to Improve Outcomes by Leveraging Early Treatment (VIOLET) Investigators.....</b>                               | <b>3</b>  |
| Supplementary tables .....                                                                                                   | 5         |
| <b>Table S1. Baseline characteristics for all randomized participants (screened deficient).....</b>                          | <b>5</b>  |
| <b>Table S2. Study initiation and dosing .....</b>                                                                           | <b>6</b>  |
| <b>Table S3. Patient outcomes for all randomized participants (screened deficient).....</b>                                  | <b>7</b>  |
| <b>Table S4. Mortality estimates by baseline 25-hydroxyvitamin D level.....</b>                                              | <b>9</b>  |
| <b>Table S5. Total calcium by study day.....</b>                                                                             | <b>10</b> |
| <b>Table S6. Ionized calcium by study day .....</b>                                                                          | <b>11</b> |
| <b>Table S7. Adverse events for all randomized participants (screened deficient).....</b>                                    | <b>12</b> |
| Supplementary figures .....                                                                                                  | 13        |
| <b>Figure S1. Flow of participants through trial.....</b>                                                                    | <b>13</b> |
| <b>Figure S2. Survival to day 90 by vitamin D or placebo group for all randomized participants (screened deficient).....</b> | <b>14</b> |
| <b>A. All randomized.....</b>                                                                                                | <b>14</b> |
| <b>B. Baseline 25-hydroxyvitamin D &lt;12 ng/mL.....</b>                                                                     | <b>14</b> |
| <b>C. Baseline 25-hydroxyvitamin D 12-19 ng/mL.....</b>                                                                      | <b>15</b> |
| <b>D. Baseline 25-hydroxyvitamin D ≥20 ng/mL.....</b>                                                                        | <b>15</b> |
| <b>Figure S3. Subgroup analysis for all-cause, all-location mortality to day 90 (primary endpoint).....</b>                  | <b>16</b> |
| <b>A. Confirmed vitamin D deficient.....</b>                                                                                 | <b>16</b> |
| <b>B. All randomized.....</b>                                                                                                | <b>17</b> |

## Collaborators

### Vitamin D to Improve Outcomes by Leveraging Early Treatment (VIOLET) Investigators

#### The National Heart, Lung, and Blood Institute Prevention and Early Treatment of Acute Lung Injury (PETAL) Clinical Trials Network:

**ALIGNE Clinical Center:** Baystate Medical Center – Jay S Steingrub\*, Mark Tidswell, Lori-Ann Kozikowski, Lesley De Souza, Cynthia Kardos; Tufts Medical Center – Nicholas S Hill, Veronica Bacong, Omar Shweish, Haval Chweich, Erik Garpestad; Brigham and Women’s Hospital – Peter Hou\*, Rebecca Baron, Anthony Massaro, Laura Fredenburgh, Imoigele Aisiku, Raghu Seethala, Jeffrey Skubic, Arman Isrealyan, Lauren Precopio, Meghan Fawcett, Sarah Pajak; Maine Medical Center – Richard Riker, Adelene MacLeod, Theresa May, Thomas Van der Kloot, David Seder

**BOSTON Clinical Center:** Beth Israel Deaconess Medical Center – Daniel Talmor\*, Nathan Shapiro\*, Valerie Banner-Goodspeed, Sharon Hayes, Ted Raddell; Massachusetts General Hospital – Kathryn A Hibbert, Michael Filbin, Kelsey Brait, Melissa Stathas, Caroline Rizzo; St. Vincent Hospital – Nathan Shapiro\*, Patricia A Arsenault, Pam Sigel, David Miru; University of Mississippi Medical Center – Alan E Jones, John R Spurzem, Michael A Puskarich, Jasmine McDonald, Maggie Kirby

**CALIFORNIA Clinical Center:** UCSF San Francisco – Michael Matthay\*, Kathleen Liu, Carolyn S Calfee, Jeff Gotts, Amy Ni, Kathryn Vessel, Annika Belzer; UCSF Fresno – Eyad Almarsi, Janna Blaauw, Alyssa Hughes, Kyndra Sousa, Patil Armenian; UC Davis – Timothy E Albertson, Brian Morrissey, Skyler J Pearson, Maya Juarez, James Chenoweth; Stanford University Hospital – Joe Levitt, Jenny Wilson, Angela Rogers, Rosemary Vojnik, Jonasel Roque; UCLA – Gregory W Hendey\*, Steven Y Chang, Nida Qadir, Bryan Garber, Christopher Phan

**COLORADO Clinical Center:** University of Colorado Hospital – Adit Ginde\*, Marc Moss\*, Lani Finck, Sarah Perman, Jean Hoffman, Katherine Mayer; Denver Health Medical Center – Ivor Douglas, Jason Haukoos, Terra Hiller, Carolyn Lyle, Judy Oakes, Emily Caruso, Meggan Schmidt, Stephanie Gravitz; Medical Center of Aurora – David Van Pelt, Jeff McKeegan, Carrie Higgins; National Jewish Health I Saint Joseph’s Hospital – James Finigan, Ryan Paterson, Kenneth Lyn-Kew, Michelle Howell

**MICHIGAN Clinical Center:** University of Michigan Medical Center – Robert C Hyzy\*, Pauline K Park\*, Kristine Nelson, Ivan N Co, Jake I McSparron, Kyle J Gunnerson, Tina Chen, Sinan Hanna, Norman Olbrich; Henry Ford Medical Center – Emmanuel P Rivers, Jayna Gardner Gray, Bruno DiGiovine, Jasreen Kaur Gill, Aaron Cook, Kaleem Chaudry, Jacqueline Day, Sarah Rubino, Anja Kathrina Jaehne, Jacqueline Pflaum, Gina Hurst, Jennifer Swiderek, Namita Jayaprakesh

**MONTEFIORE-SINAI Clinical Center:** Montefiore Moses – Michelle Ng Gong\*, Aluko Hope, Swarna Gummadi; Mount Sinai Hospital – Lynne D. Richardson\*, Samuel Acquah, Mark Andreae, Kusum Mathews, Neha Goel, Cindy Clesca, Natalie S Massenburg; Montefiore Weiler – Jen-Ting (Tina) Chen, Brenda Lopez, Michael Aboodi

**OHIO Clinical Center:** Cleveland Clinic Foundation – R. Duncan Hite\*, Abhijit Duggal, Sharon Mace, Andrei Hastings, Omar Mehkri, Stephanie Stoianoff; Ohio State University Wexner Medical Center – Thomas E Terndrup\*; Matthew C Exline, Joshua A Englert, Sarah C Karow, Joshua Garmatter; University of Cincinnati Medical Center – Kristin Hudock, Ope Adeoye, David Norton, Autumn Studer, Kari Gorder; Northwestern Memorial Hospital – D. Mark Courtney, Megan Rowland

**PACIFIC NORTHWEST Clinical Center:** Harborview Medical Center – Catherine L Hough\*, Bryce R.H Robinson\*, Nicholas J Johnson, Stephanie Gundel, Sarah Katsandres; University of Washington Medical Center – Daniel Henning, Tzevan Poon, Sarah Dean, Jennifer Cardey, Anna Ungar; Swedish Medical Center – D. Shane O’Mahony, Julie Wallick; Oregon Health and Science University – Akram Khan, Martin Schreiber, Bory Kea, Ebaad Haq, Olivia Krol

**PITTSBURGH Clinical Center:** UPMC Presbyterian – Derek C Angus\*, Donald M Yealy\*, David T Huang, Bryan J McVerry, Caroline Gacka; UPMC Mercy – Donald M Yealy\*, Derek C Angus\*, Joseph Yanta, Michael Abesamis, Sarah L

McGarry; Penn State Hershey Medical Center –Jordan Schooler, Margaret Wojnar, Elizabeth Sinz, Christopher Zacko, Nancy Campbell

**SOUTHEAST Clinical Center:** Wake Forest Baptist Health –D. Clark Files\*, Chadwick Miller\*, Kevin Gibbs, Lori Flores, Lauren Koehler; U. Virginia Medical Center –Kyle Enfield, Mark Sochor, Mary Marshall, Ashley Simpson, Desmarie Sherwood; Virginia Commonwealth University Medical Center–Marjolein de Wit, Stephen Miller, Amer Syed, Jessica Mason, Stella Hamman; U. Kentucky–Peter Morris, Roger Humphries, Jamie Sturgill, Ashley Montgomery-Yates, Evan P Cassity

**UTAH:** Intermountain Medical Center –Samuel M Brown\*, Joseph Bledsoe\*, Ithan Peltan, Michael Lanspa, Katie Brown, Brent Armbruster, Quinn Montgomery, Valerie Aston, Eliotte Hirshberg; Utah Valley Regional Medical Center –Dixie Harris, Wayne Woodard, Naresh Kumar, Mardee Merrill, David Nielson, Austin Daw; University of Utah Hospital –Estelle Harris, Robert Paine, Amber Plante, Elizabeth Middleton;

**VANDERBILT Clinical Center:** Vanderbilt University Medical Center –Wesley H Self\*, Todd W Rice\*, Matthew W Semler, Adrienne Baughman, Margaret Hays, Karen Miller, Susan Mogan; Louisiana State University Health Sciences Center—David R Janz, Paula Lauto, Margaret M Moore, Bennett P deBoisblanc, John P Hunt; UNC Medical Center—Shannon S Carson, Timothy F Platts-Mills, Eugenia B Quackenbush, Kevin J Chronowski, Colleen Rice; Duke University Medical Center—Alexander T Limkakeng, Jr., S. Michelle Griffin, J. Clancy Leahy, Christopher Cox, John Eppensteiner

**Clinical Coordinating Center:** Massachusetts General Hospital Biostatistics Center (CCC): David A Schoenfeld\*, B Taylor Thompson\*, Kathleen Tiffany Lee, Christine Ulysse, Cathryn F Oldmixon, Nancy J Ringwood, Jenna R Pedrin, Richard E Morse, Douglas Hayden

**Steering Committee Chair:** Johns Hopkins University School of Medicine: Roy G Brower

**National Heart, Lung, and Blood Institute:** Karen Bienstock, Carol J Blaisdell, Michelle Freemer, Andrea L Harabin, Lauren Kunz, Lora A Reineck, Peyvand Ghofrani, Myron A Waclawiw, Gail Weinmann

**Protocol Review Committee:** Laurie J Morrison, Charles B Cairns, D. Mark Courtney, Mark N Gillespie, Richard J Kryscio, Damon Scales

**Data and Safety Monitoring Board:** Polly Parsons, Jason D Christie, Jesse R Hall, Nicholas J. Horton, Jeffrey A Kline, Mitchell Levy, Mark Siegel, Ian Stiell, Laurie S Zoloth

*\*Clinical Center or CCC Principal Investigator*

## Supplementary Tables

**Table S1. Baseline characteristics for all randomized participants (screened deficient)**

| Characteristic                                         | Vitamin D (N=690)   | Placebo (N=668)     |
|--------------------------------------------------------|---------------------|---------------------|
| <b>Demographic</b>                                     |                     |                     |
| Age in years – mean ± SD                               | 57.3 ± 15.6 (n=690) | 55.3 ± 16.5 (n=668) |
| Women – no. (%)                                        | 300 (43.5)          | 304 (45.5)          |
| Race/ethnicity                                         |                     |                     |
| Non-Hispanic white – no. (%)                           | 375 (54.3)          | 354 (53.0)          |
| Black – no. (%)                                        | 155 (22.5)          | 148 (22.2)          |
| Nonblack Hispanic – no. (%)                            | 35 (5.1)            | 35 (5.2)            |
| Other – no. (%)                                        | 19 (2.8)            | 20 (3.0)            |
| Not available – no. (%)                                | 106 (15.4)          | 111 (16.6)          |
| Facility residence prior to hospitalization – no. (%)  | 53 (7.7)            | 48 (7.2)            |
| EQ-5D-5L – mean ± SD                                   | 0.7 ± 0.3 (n=644)   | 0.7 ± 0.3 (n=622)   |
| <b>Clinical</b>                                        |                     |                     |
| Charlson co-morbidity index – mean ± SD                | 4.1 ± 2.9 (n=670)   | 3.6 ± 2.9 (n=644)   |
| Body mass index, kg/m <sup>2</sup> – mean ± SD         | 30.1 ± 10.1 (n=669) | 31 ± 11.5 (n=657)   |
| Acute risk factors for mortality – no. (%)*            |                     |                     |
| Pneumonia                                              | 256 (37.1)          | 232 (34.7)          |
| Shock                                                  | 237 (34.3)          | 227 (34.0)          |
| Sepsis                                                 | 235 (34.1)          | 220 (32.9)          |
| Mechanical ventilation for acute respiratory failure   | 150 (21.7)          | 148 (22.2)          |
| Aspiration                                             | 42 (6.1)            | 39 (5.8)            |
| Lung contusion                                         | 21 (3.0)            | 22 (3.3)            |
| Pancreatitis                                           | 20 (2.9)            | 23 (3.4)            |
| Smoke inhalation                                       | 1 (0.1)             | 3 (0.4)             |
| Medical intensive care unit admission – no. (%)        | 577 (83.6)          | 569 (85.2)          |
| Illness severity                                       |                     |                     |
| Total SOFA – mean ± SD                                 | 5.5 ± 3.6 (n=690)   | 5.3 ± 3.7 (n=668)   |
| LIPS – mean ± SD                                       | 5.2 ± 3.0 (n=690)   | 5.2 ± 3.0 (n=668)   |
| Mechanical ventilation – no. (%)                       | 220 (31.9)          | 222 (33.2)          |
| ARDS – no. (%)                                         | 54 (7.8)            | 49 (7.3)            |
| Vasopressor use at baseline – no. (%)                  | 215 (31.2)          | 211 (31.6)          |
| <b>Vitamin D-related</b>                               |                     |                     |
| Vitamin D supplement use in past week – no. (%)        | 60 (8.7)            | 48 (7.2)            |
| Multivitamin use in past week – no. (%)                | 57 (8.3)            | 52 (7.8)            |
| Estimated average daily vitamin D dose, IU – mean ± SD | 3386 ± 11317 (n=95) | 4278 ± 13337 (n=83) |
| 25-hydroxyvitamin D, ng/mL – mean ± SD                 | 13.9 ± 7.7 (n=661)  | 13.5 ± 7.9 (n=644)  |
| Total serum calcium, mg/dL – mean ± SD                 | 8.3 ± 0.9 (n=678)   | 8.3 ± 1.0 (n=649)   |
| Ionized calcium, mg/dL – mean ± SD                     | 4.3 ± 1.3 (n=264)   | 4.3 ± 0.9 (n=259)   |
| Creatinine, mg/dL – mean ± SD                          | 2.3 ± 2.4 (n=687)   | 2.0 ± 2.1 (n=667)   |
| eGFR, ml/min/1.73m <sup>2</sup> – mean ± SD            | 57.8 ± 39.1 (n=687) | 60.6 ± 37.9 (n=667) |

\* may have more than one risk factor

**Abbreviations:** LC/MS/MS, liquid chromatography tandem mass spectrometry; EQ-5D-5L, EuroQol-5 dimension-5 level quality of life assessment; SOFA, sequential organ failure assessment; LIPS, lung injury prediction score; ARDS, acute respiratory distress syndrome; eGFR, estimated glomerular filtration rate

**Table S2. Study initiation and dosing**

| Characteristic                                              | Confirmed Deficient |                 | Screened Deficient (All Randomized) |                 |
|-------------------------------------------------------------|---------------------|-----------------|-------------------------------------|-----------------|
|                                                             | Vitamin D (N=538)   | Placebo (N=540) | Vitamin D (N=690)                   | Placebo (N=668) |
| Met inclusion in emergency department – no. (%)             | 453 (84)            | 460 (85)        | 579 (84)                            | 566 (85)        |
| Inclusion to randomization, hrs – mean ± SD                 | 6.6±3.4 (n=538)     | 6.8±3.5 (n=540) | 6.7±3.5 (n=690)                     | 6.8±3.5 (n=668) |
| Randomization to study drug administration, hrs – mean ± SD | 1.2±1.1 (n=538)     | 1.1±1.0 (n=540) | 1.2±1.1 (n=677)                     | 1.1±1.0 (n=655) |
| Study drug administered – no. (%)                           | 532 (99)            | 532 (99)        | 677 (98)                            | 655 (98)        |
| Study drug tolerated – no. (%)                              | 521 (98)            | 524 (99)        | 662 (98)                            | 644 (98)        |

**Confirmed deficient** was the primary analysis population and included all patients who underwent randomization and had vitamin D deficiency confirmed by liquid chromatography–tandem mass spectrometry.

**Table S3. Patient outcomes for all randomized participants (screened deficient)**

| Characteristic                                                                 | Vitamin D (N=690)   | Placebo (N=668)     | P-Value or Diff (95% CI) |
|--------------------------------------------------------------------------------|---------------------|---------------------|--------------------------|
| <b>Primary Endpoint:</b> All-cause, all-location mortality to day 90 – no. (%) | 159 (23.3) (n=681)  | 137 (20.9) (n=656)  | 0.28                     |
| <b>Secondary Endpoints</b>                                                     |                     |                     |                          |
| <b>Clinical</b>                                                                |                     |                     |                          |
| All-cause, all-location mortality to day 28 – no. (%)                          | 112 (16.4) (n=681)  | 89 (13.6) (n=656)   | 2.9 (-0.9, 6.7)          |
| Hospital mortality to day 90 – no. (%)                                         | 115 (16.7) (n=690)  | 96 (14.4) (n=667)   | 2.3 (-1.6, 6.1)          |
| Alive and home (prior level of care) at day 90 – no. (%)                       | 438 (64.7) (n=677)  | 432 (66.1) (n=654)  | -1.4 (-6.5, 3.8)         |
| Hospital length of stay to day 90, days – mean ± SD                            | 8.9±9.0 (n=522)     | 10.1±10.7 (n=517)   | -1.2(-2.4, -0.0)         |
| Hospital length of stay to day 90, days – mean ± SE*                           | 8.8±0.32 (n=522)    | 9.7±0.35 (n=517)    | -0.8 (-1.8, 0.1)         |
| Discharged to other healthcare facility – no. (%)                              | 94 (18.0) (n=522)   | 109 (21.0) (n=519)  | -3.0 (-7.8, 1.8)         |
| Healthcare facility length of stay, days – mean ± SD                           | 6.8±19.1 (n=518)    | 8.3±20.6 (n=515)    | -1.5 (-4.0, 0.9)         |
| Healthcare facility length of stay, days – mean ± SE*                          | 6.1±0.60 (n=518)    | 7.8±0.67 (n=515)    | -1.6 (-3.4, 0.1)         |
| Ventilator-free days to day 28 – mean ± SD                                     | 21.7±11.1 (n=671)   | 22.1±10.5 (n=659)   | -0.5 (-1.6, 0.7)         |
| EQ-5D-5L (Δ day 90 minus baseline) – mean ± SD                                 | 0.0±0.2 (n=432)     | 0.0±0.2 (n=429)     | 0.0 (-0.0, 0.0)          |
| EQ-5D-5L (Δ day 90 minus baseline) – mean ± SE*                                | 0.0±0.0 (n=432)     | 0.0±0.0 (n=429)     | 0.0 (-0.0, 0.0)          |
| <b>Physiological</b>                                                           |                     |                     |                          |
| New (post-randomization) mechanical ventilation – no. (%)                      | 49 (10.4) (n=470)   | 38 (8.6) (n=443)    | 1.8 (-2.0, 5.6)          |
| Lowest P/F to day 7 – mean ± SD                                                | 187.8±103.0 (n=155) | 185.7±107.1 (n=170) | 2.0 (-20.9, 25.0)        |
| New ARDS to day 7 – no. (%)                                                    | 22 (4.1) (n=531)    | 23 (4.5) (n=515)    | -0.3 (-2.8, 2.1)         |
| ARDS severity to day 7                                                         | (n=22)              | (n=23)              |                          |
| Mild – no. (%)                                                                 | 8 (36.4)            | 5 (21.7)            | 14.6 (-11.6, 40.9)       |
| Moderate – no. (%)                                                             | 9 (40.9)            | 15 (65.2)           | -24.3 (-52.6, 4.0)       |
| Severe – no. (%)                                                               | 5 (22.7)            | 3 (13.0)            | 9.7 (-12.6, 32.0)        |
| Worst AKI severity to day 7                                                    | (n=615)             | (n=607)             |                          |
| None – no. (%)                                                                 | 350 (56.9)          | 366 (60.3)          | -3.4 (-8.9, 2.1)         |
| Mild – no. (%)                                                                 | 99 (16.1)           | 94 (15.5)           | 0.6 (-3.5, 4.7)          |
| Moderate – no. (%)                                                             | 67 (10.9)           | 62 (10.2)           | 0.7 (-2.8, 4.1)          |
| Severe – no. (%)                                                               | 99 (16.1)           | 85 (14.0)           | 2.1 (-1.9, 6.1)          |
| New RRT to day 7 – no. (%)                                                     | 25 (4.0) (n=620)    | 25 (4.1) (n=614)    | -0.0 (-2.2, 2.2)         |
| Highest creatinine, mg/dl to day 7 – mean ± SE†                                | 2.2±0.1 (n=666)     | 2.2±0.1 (n=653)     | -0.0 (-0.2, 0.1)         |
| New vasopressor use to day 7 – no. (%)                                         | 56 (12.2) (n=460)   | 55 (12.1) (n=454)   | 0.1 (-4.2, 4.3)          |
| Highest cardiovascular SOFA to day 7 – mean ± SE†                              | 1.4±0.1 (n=671)     | 1.4±0.1 (n=661)     | -0.0 (-0.2, 0.1)         |
| 25-hydroxyvitamin D, ng/mL at day 3 – mean ± SD                                | 49.0±23.9 (n=170)   | 13.7±7.7 (n=163)    | 35.3 (31.4, 39.2)        |
| <20 – no. (%)                                                                  | 19 (11.2)           | 134 (82.2)          | -71.0 (-78.6, -63.5)     |
| 20 to <30 – no. (%)                                                            | 21 (12.4)           | 25 (15.3)           | -3.0 (-10.4, 4.4)        |
| 30 to <120 – no. (%)                                                           | 129 (75.9)          | 4 (2.5)             | 73.4 (66.6, 80.3)        |
| ≥120 – no. (%)                                                                 | 1 (0.6)             | 0 (0.0)             | 0.6 (-0.6, 1.7)          |
| IL-6, pg/ml at day 3 – mean ± SD                                               | 190±1456 (n=165)    | 252±2000 (n=154)    | -63 (-446, 378)          |
| <b>Safety</b>                                                                  |                     |                     |                          |
| Serious adverse events – no.                                                   | 18                  | 19                  | 0.87                     |
| Hypercalcemia to day 14 – no. (%)                                              | 19 (2.9) (n=659)    | 12 (1.9) (n=648)    | 0.22                     |
| Highest total calcium to day 14, mg/dL – mean ± SD                             | 8.9±0.8 (n=652)     | 8.8±0.7 (n=637)     | <0.001                   |
| Highest ionized calcium to day 14, mg/dL – mean ± SD                           | 4.7±0.8 (n=190)     | 4.6±0.7 (n=216)     | 0.26                     |
| Kidney stones to day 90 – no. (%)                                              | 1 (0.2) (n=652)     | 4 (0.6) (n=631)     | 0.21                     |
| Falls to day 90 – no. (%)                                                      | 46 (7.1) (n=652)    | 35 (5.5) (n=631)    | 0.27                     |
| Fall-related fractures to day 90 – no. (%)                                     | 6 (0.9) (n=652)     | 4 (0.6) (n=631)     | 0.75                     |

\* Survivor average causal effect



† Controlled for baseline value using repeated measures ANOVA with a treatment by time interaction and shared intercept at baseline.

**Abbreviations:** LC/MS/MS, liquid chromatography tandem mass spectrometry; EQ-5D-5L, EuroQol-5 dimension-5 level quality of life assessment; P/F, PaO<sub>2</sub>/FiO<sub>2</sub>; ARDS, acute respiratory distress syndrome; AKI, acute kidney injury; RRT, renal replacement therapy; SOFA, sequential organ failure assessment; IL-6, interleukin-6

**Table S4. Mortality estimates by baseline 25-hydroxyvitamin D level**

| Baseline 25-hydroxyvitamin D by LC/MS/MS (ng/mL) | Vitamin D (N=653) Mortality (% ± SE) | Placebo (N=632) Mortality (% ± SE) | Difference (95% CI) |
|--------------------------------------------------|--------------------------------------|------------------------------------|---------------------|
| 5                                                | 27.1 ± 3.3                           | 24.0 ± 3.7                         | 3.1 (-5.4, 13.2)    |
| 10                                               | 24.7 ± 2.5                           | 20.4 ± 2.4                         | 4.4 (-3.6, 10.0)    |
| 15                                               | 22.3 ± 2.3                           | 18.9 ± 2.5                         | 3.4 (-3.7, 9.7)     |
| 20                                               | 19.9 ± 2.7                           | 19.4 ± 3.4                         | 0.5 (-9.5, 7.4)     |
| 25                                               | 17.5 ± 3.6                           | 20.8 ± 4.4                         | -3.3 (-11.4, 10.9)  |
| 30                                               | 16.0 ± 4.9                           | 22.0 ± 5.9                         | -6.0 (-18.4, 11.6)  |

Estimates and SEs were obtained from the quadratic smoothing spline in each treatment group

Corresponds with estimates displayed in Figure 3

**Table S5. Total calcium by study day**

| Study Day | Confirmed Deficient |               |         | Screened Deficient |               |         |
|-----------|---------------------|---------------|---------|--------------------|---------------|---------|
|           | Mean ± SD (n)       | Vitamin D     | Placebo | P-value            | Vitamin D     | Placebo |
| Day 1     | 8.1±0.9 (483)       | 8.1±0.8 (487) | 0.530   | 8.2±0.9 (626)      | 8.1±0.8 (605) | 0.31    |
| Day 2     | 8.4±0.8 (440)       | 8.2±0.7 (438) | 0.005   | 8.4±0.8 (570)      | 8.2±0.7 (540) | <.001   |
| Day 3     | 8.5±0.9 (392)       | 8.3±0.8 (411) | 0.001   | 8.5±0.9 (504)      | 8.3±0.8 (506) | <.001   |
| Day 4     | 8.5±0.9 (340)       | 8.4±0.7 (350) | 0.006   | 8.6±0.9 (440)      | 8.4±0.7 (434) | 0.003   |
| Day 5     | 8.5±0.8 (287)       | 8.4±0.7 (303) | 0.02    | 8.6±0.8 (369)      | 8.4±0.8 (371) | 0.002   |
| Day 6     | 8.6±0.8 (251)       | 8.4±0.8 (254) | 0.006   | 8.6±0.8 (327)      | 8.4±0.7 (318) | 0.001   |
| Day 7     | 8.5±0.8 (215)       | 8.4±0.8 (231) | 0.11    | 8.6±0.8 (276)      | 8.4±0.7 (282) | 0.02    |
| Day 8     | 8.4±1.2 (182)       | 8.3±1.0 (203) | 0.35    | 8.5±1.2 (227)      | 8.4±0.9 (250) | 0.23    |
| Day 9     | 8.6±1.0 (146)       | 8.3±1.2 (167) | 0.03    | 8.6±1.0 (185)      | 8.3±1.1 (199) | 0.03    |
| Day 10    | 8.6±1.0 (126)       | 8.3±1.0 (148) | 0.05    | 8.6±0.9 (158)      | 8.4±0.9 (179) | 0.03    |
| Day 11    | 8.6±0.8 (118)       | 8.2±1.4 (132) | 0.01    | 8.6±0.8 (148)      | 8.2±1.3 (160) | 0.008   |
| Day 12    | 8.5±0.8 (94)        | 8.4±0.9 (118) | 0.21    | 8.5±0.8 (121)      | 8.4±0.9 (142) | 0.15    |
| Day 13    | 8.6±0.9 (82)        | 8.4±1.0 (98)  | 0.22    | 8.6±0.8 (103)      | 8.4±0.9 (123) | 0.15    |
| Day 14    | 8.5±0.7 (72)        | 8.4±0.7 (92)  | 0.51    | 8.5±0.8 (90)       | 8.4±0.7 (112) | 0.38    |

**Table S6. Ionized calcium by study day**

| Study Day | Confirmed Deficient |              |               | Screened Deficient |               |               |         |
|-----------|---------------------|--------------|---------------|--------------------|---------------|---------------|---------|
|           | Mean ± SD (n)       | Vitamin D    | Placebo       | P-value            | Vitamin D     | Placebo       | P-value |
| Day 1     |                     | 4.4±0.8 (96) | 4.4±0.7 (122) | 0.86               | 4.4±0.7 (121) | 4.4±0.7 (143) | 1.00    |
| Day 2     |                     | 4.4±0.4 (75) | 4.5±0.6 (73)  | 0.24               | 4.5±0.7 (93)  | 4.5±0.6 (97)  | 0.74    |
| Day 3     |                     | 4.4±0.4 (66) | 4.5±0.7 (49)  | 0.45               | 4.4±0.4 (80)  | 4.5±0.6 (63)  | 0.39    |
| Day 4     |                     | 4.4±0.4 (47) | 4.6±0.8 (47)  | 0.40               | 4.4±0.4 (57)  | 4.6±0.7 (60)  | 0.21    |
| Day 5     |                     | 4.5±0.5 (35) | 4.5±0.4 (41)  | 0.88               | 4.6±0.5 (46)  | 4.5±0.4 (48)  | 0.62    |
| Day 6     |                     | 4.8±1.0 (29) | 4.5±0.5 (26)  | 0.22               | 4.7±0.9 (38)  | 4.6±0.5 (30)  | 0.32    |
| Day 7     |                     | 4.5±0.4 (23) | 4.5±0.5 (30)  | 0.67               | 4.6±0.5 (30)  | 4.5±0.4 (34)  | 0.60    |
| Day 8     |                     | 4.7±0.8 (19) | 4.4±0.4 (30)  | 0.04               | 4.8±0.8 (23)  | 4.4±0.4 (35)  | 0.01    |
| Day 9     |                     | 4.7±0.9 (13) | 4.6±0.8 (22)  | 0.69               | 4.7±0.7 (18)  | 4.6±0.7 (27)  | 0.56    |
| Day 10    |                     | 4.6±0.5 (12) | 4.7±0.8 (23)  | 0.64               | 4.6±0.5 (15)  | 4.7±0.7 (27)  | 0.65    |
| Day 11    |                     | 4.4±0.5 (11) | 4.4±0.4 (17)  | 0.80               | 4.5±0.5 (15)  | 4.5±0.4 (20)  | 0.86    |
| Day 12    |                     | 4.4±0.5 (12) | 4.6±0.4 (14)  | 0.26               | 4.4±0.5 (15)  | 4.6±0.4 (16)  | 0.16    |
| Day 13    |                     | 4.4±0.4 (12) | 4.6±0.5 (16)  | 0.48               | 4.4±0.4 (15)  | 4.6±0.5 (19)  | 0.22    |
| Day 14    |                     | 4.4±0.2 (10) | 4.7±0.6 (10)  | 0.07               | 4.4±0.3 (13)  | 4.7±0.6 (13)  | 0.08    |

**Table S7. Adverse events**

| Organ System                                     | Type       | Confirmed Deficient |         | Confirmed Not Deficient |         | Screened Deficient |         |
|--------------------------------------------------|------------|---------------------|---------|-------------------------|---------|--------------------|---------|
|                                                  |            | Vitamin D           | Placebo | Vitamin D               | Placebo | Vitamin D          | Placebo |
| Blood and lymphatic disorders                    | Severe     | 2                   | 0       | 0                       | 0       | 2                  | 0       |
|                                                  | Non-severe | 1                   | 0       | 0                       | 0       | 1                  | 0       |
| Cardiac disorders                                | Severe     | 0                   | 2       | 0                       | 0       | 0                  | 2       |
|                                                  | Non-severe | 2                   | 6       | 1                       | 0       | 3                  | 6       |
| Ear and labyrinth disorders                      | Severe     | 0                   | 0       | 0                       | 0       | 0                  | 0       |
|                                                  | Non-severe | 0                   | 1       | 0                       | 0       | 0                  | 1       |
| Endocrine disorders                              | Severe     | 2                   | 0       | 0                       | 0       | 2                  | 0       |
|                                                  | Non-severe | 0                   | 0       | 0                       | 0       | 0                  | 0       |
| Gastrointestinal disorders                       | Severe     | 2                   | 1       | 1                       | 1       | 3                  | 2       |
|                                                  | Non-severe | 1                   | 0       | 0                       | 0       | 1                  | 0       |
| General disorders and administration             | Severe     | 0                   | 1       | 0                       | 0       | 0                  | 1       |
|                                                  | Non-severe | 2                   | 2       | 0                       | 0       | 2                  | 2       |
| Infections and infestations                      | Severe     | 1                   | 0       | 0                       | 0       | 1                  | 0       |
|                                                  | Non-severe | 0                   | 1       | 1                       | 0       | 1                  | 1       |
| Injury, poisoning, and procedural complications  | Severe     | 0                   | 0       | 0                       | 0       | 0                  | 0       |
|                                                  | Non-severe | 1                   | 0       | 0                       | 0       | 1                  | 0       |
| Investigations                                   | Severe     | 1                   | 0       | 0                       | 0       | 1                  | 0       |
|                                                  | Non-severe | 0                   | 0       | 0                       | 0       | 0                  | 0       |
| Nervous system disorders                         | Severe     | 0                   | 0       | 0                       | 0       | 0                  | 0       |
|                                                  | Non-severe | 1                   | 1       | 2                       | 2       | 3                  | 3       |
| Renal and urinary disorders                      | Severe     | 1                   | 1       | 0                       | 0       | 1                  | 1       |
|                                                  | Non-severe | 2                   | 1       | 0                       | 0       | 2                  | 1       |
| Respiratory, thoracic, and mediastinal disorders | Severe     | 0                   | 0       | 1                       | 0       | 1                  | 0       |
|                                                  | Non-severe | 2                   | 3       | 0                       | 0       | 2                  | 3       |
| Skin and subcutaneous tissue disorders           | Severe     | 1                   | 0       | 0                       | 0       | 1                  | 0       |
|                                                  | Non-severe | 0                   | 0       | 0                       | 0       | 0                  | 0       |
| Vascular disorders                               | Severe     | 0                   | 0       | 0                       | 0       | 0                  | 0       |
|                                                  | Non-severe | 0                   | 2       | 1                       | 0       | 1                  | 2       |

## Supplementary Figures

**Figure S1.** Flow of participants through trial

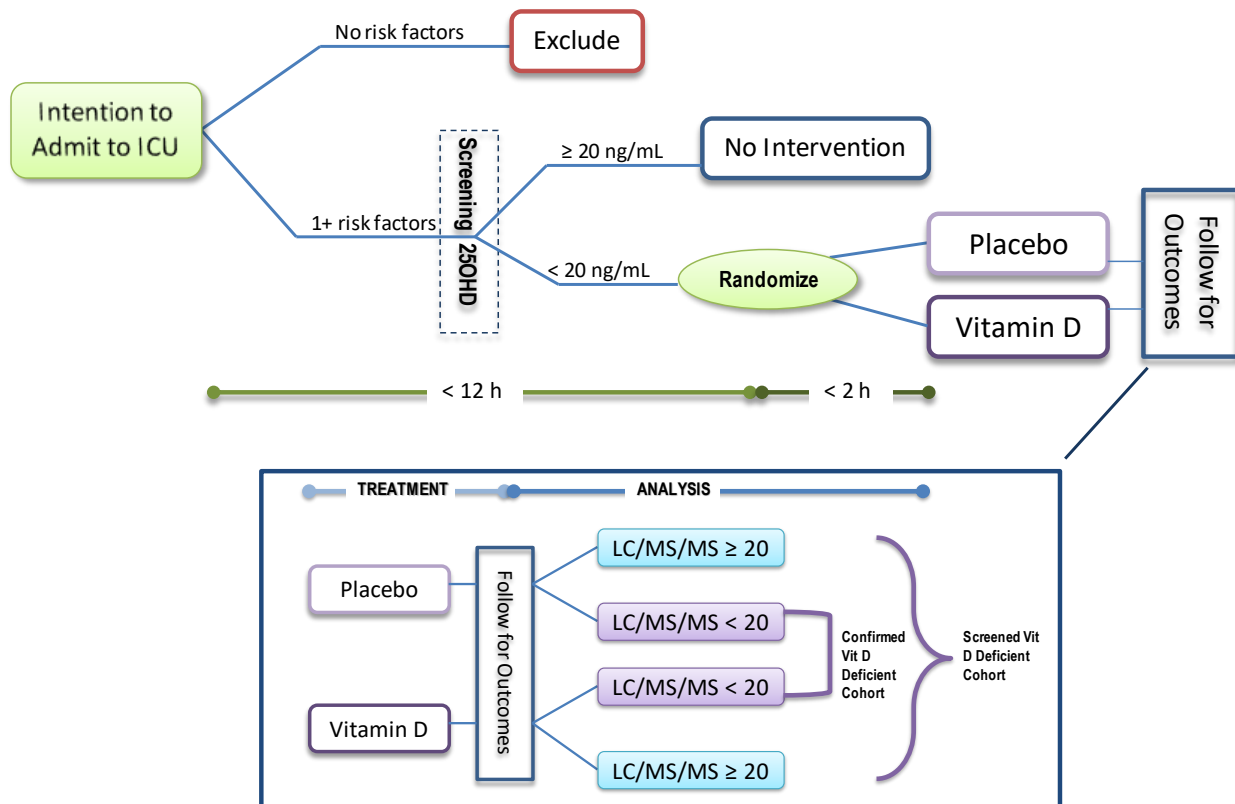

**Figure S2.** Survival to day 90 by vitamin D or placebo group for all randomized participants (screened deficient)

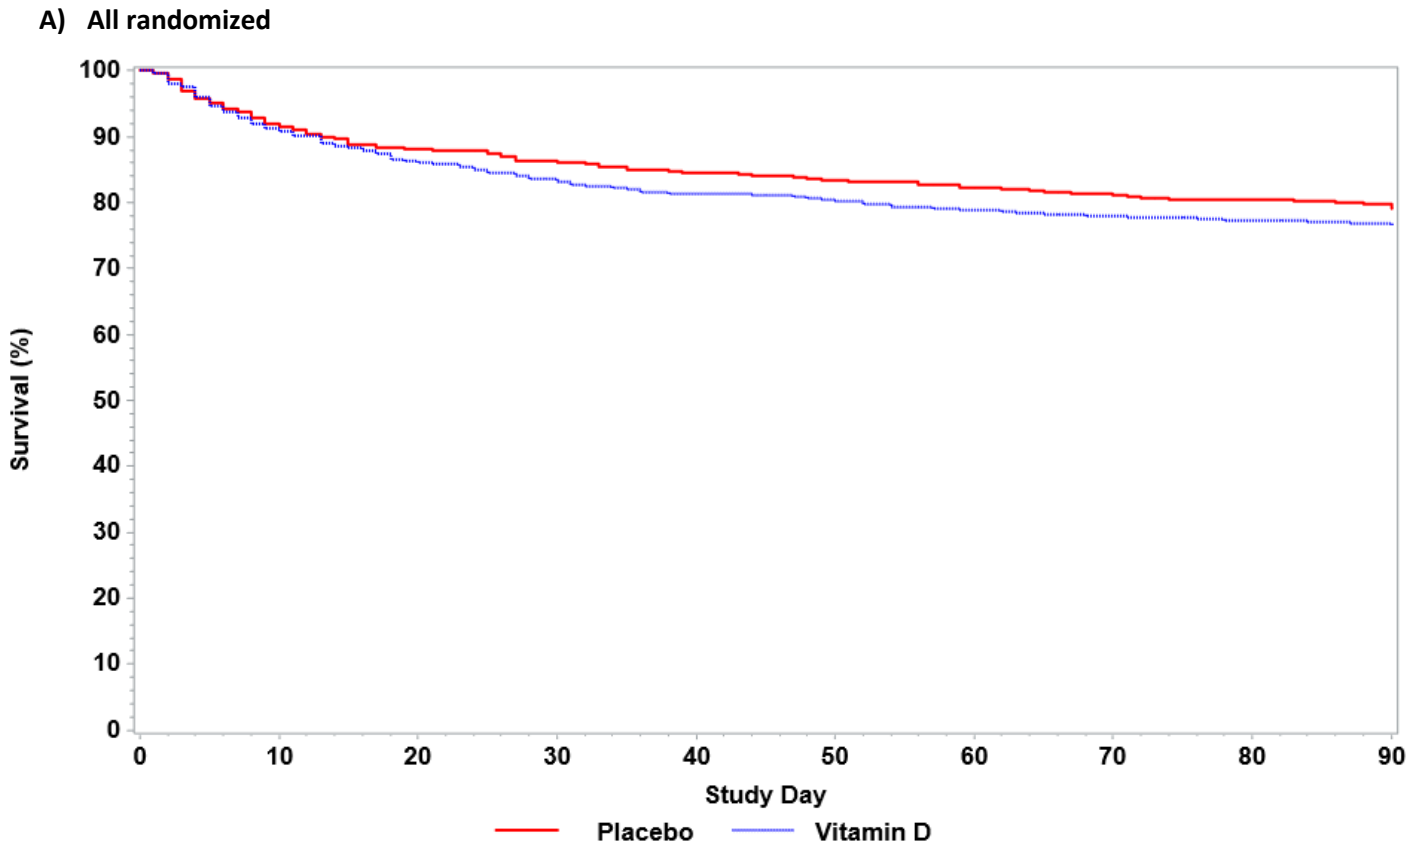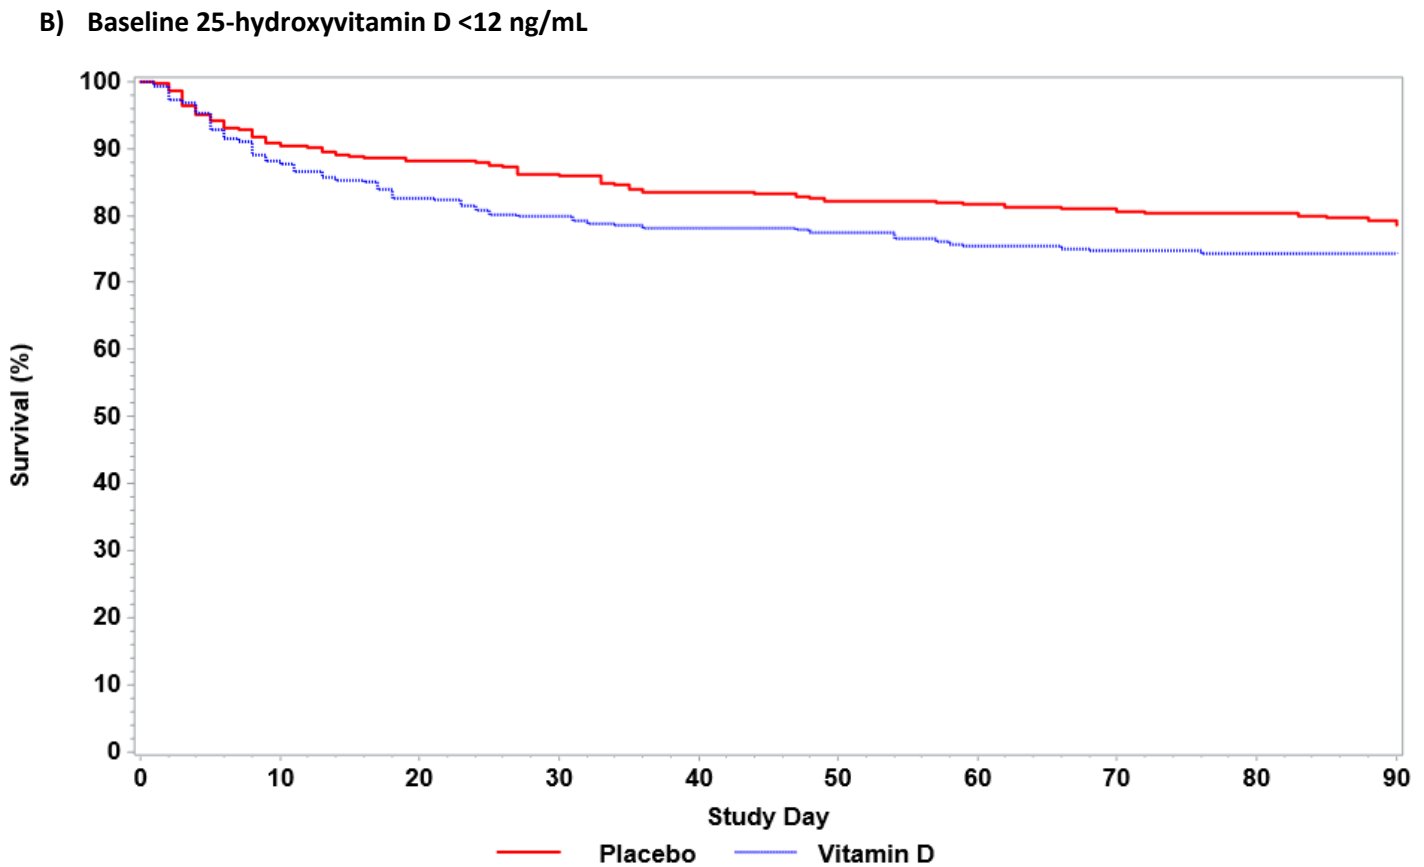

C) Baseline 25-hydroxyvitamin D 12-19 ng/mL

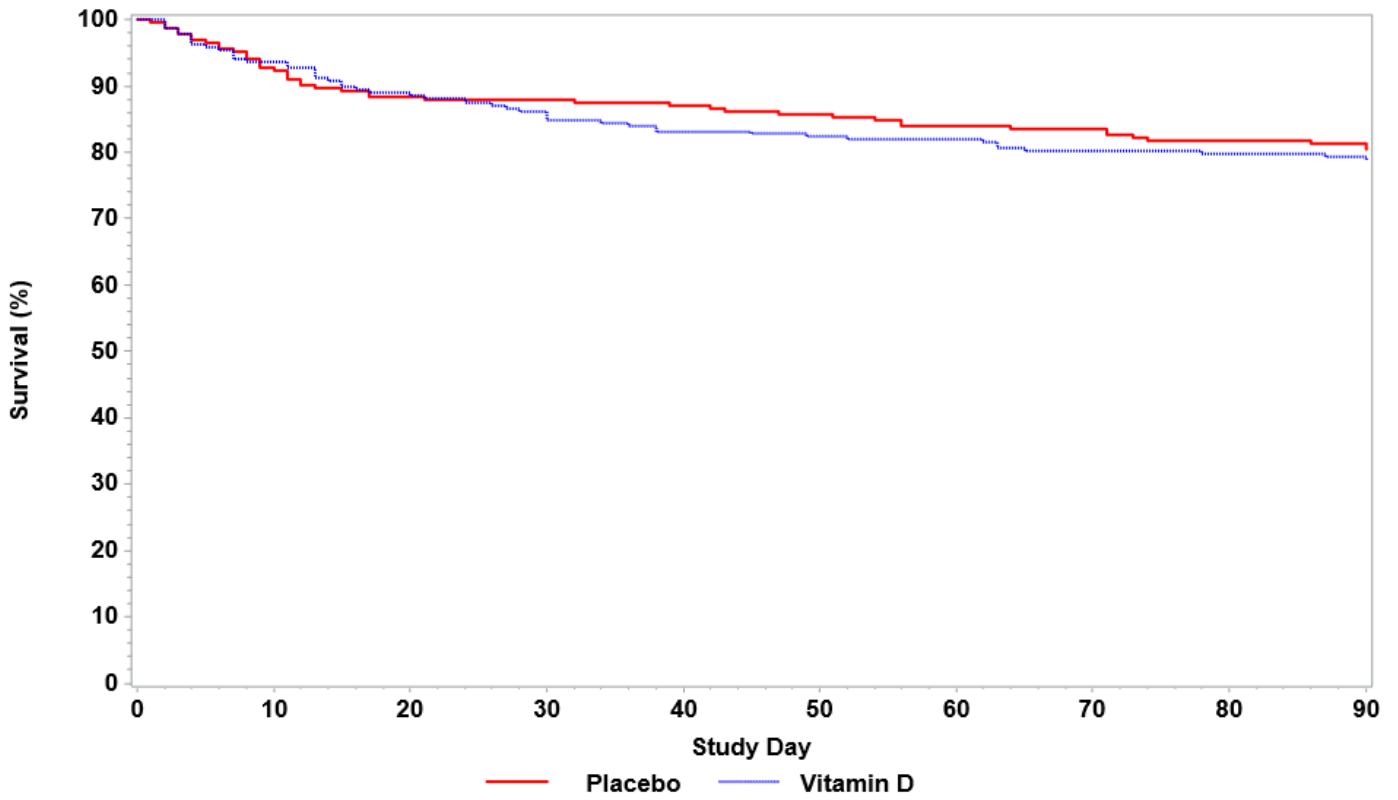

D) Baseline 25-hydroxyvitamin D  $\geq 20$  ng/mL

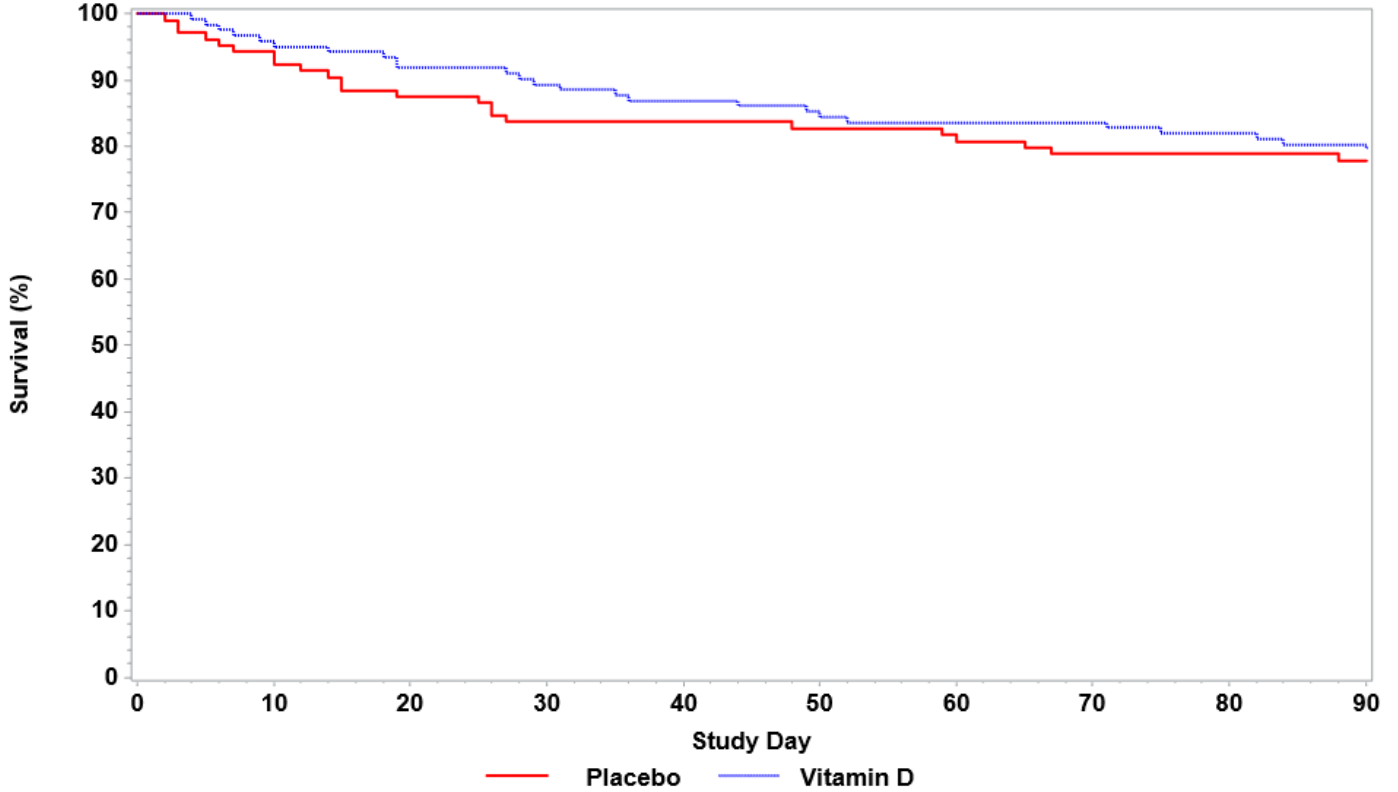



**Figure S3. Subgroup analysis for all-cause, all-location mortality to day 90 (primary endpoint)**

**A) Confirmed vitamin D deficient**

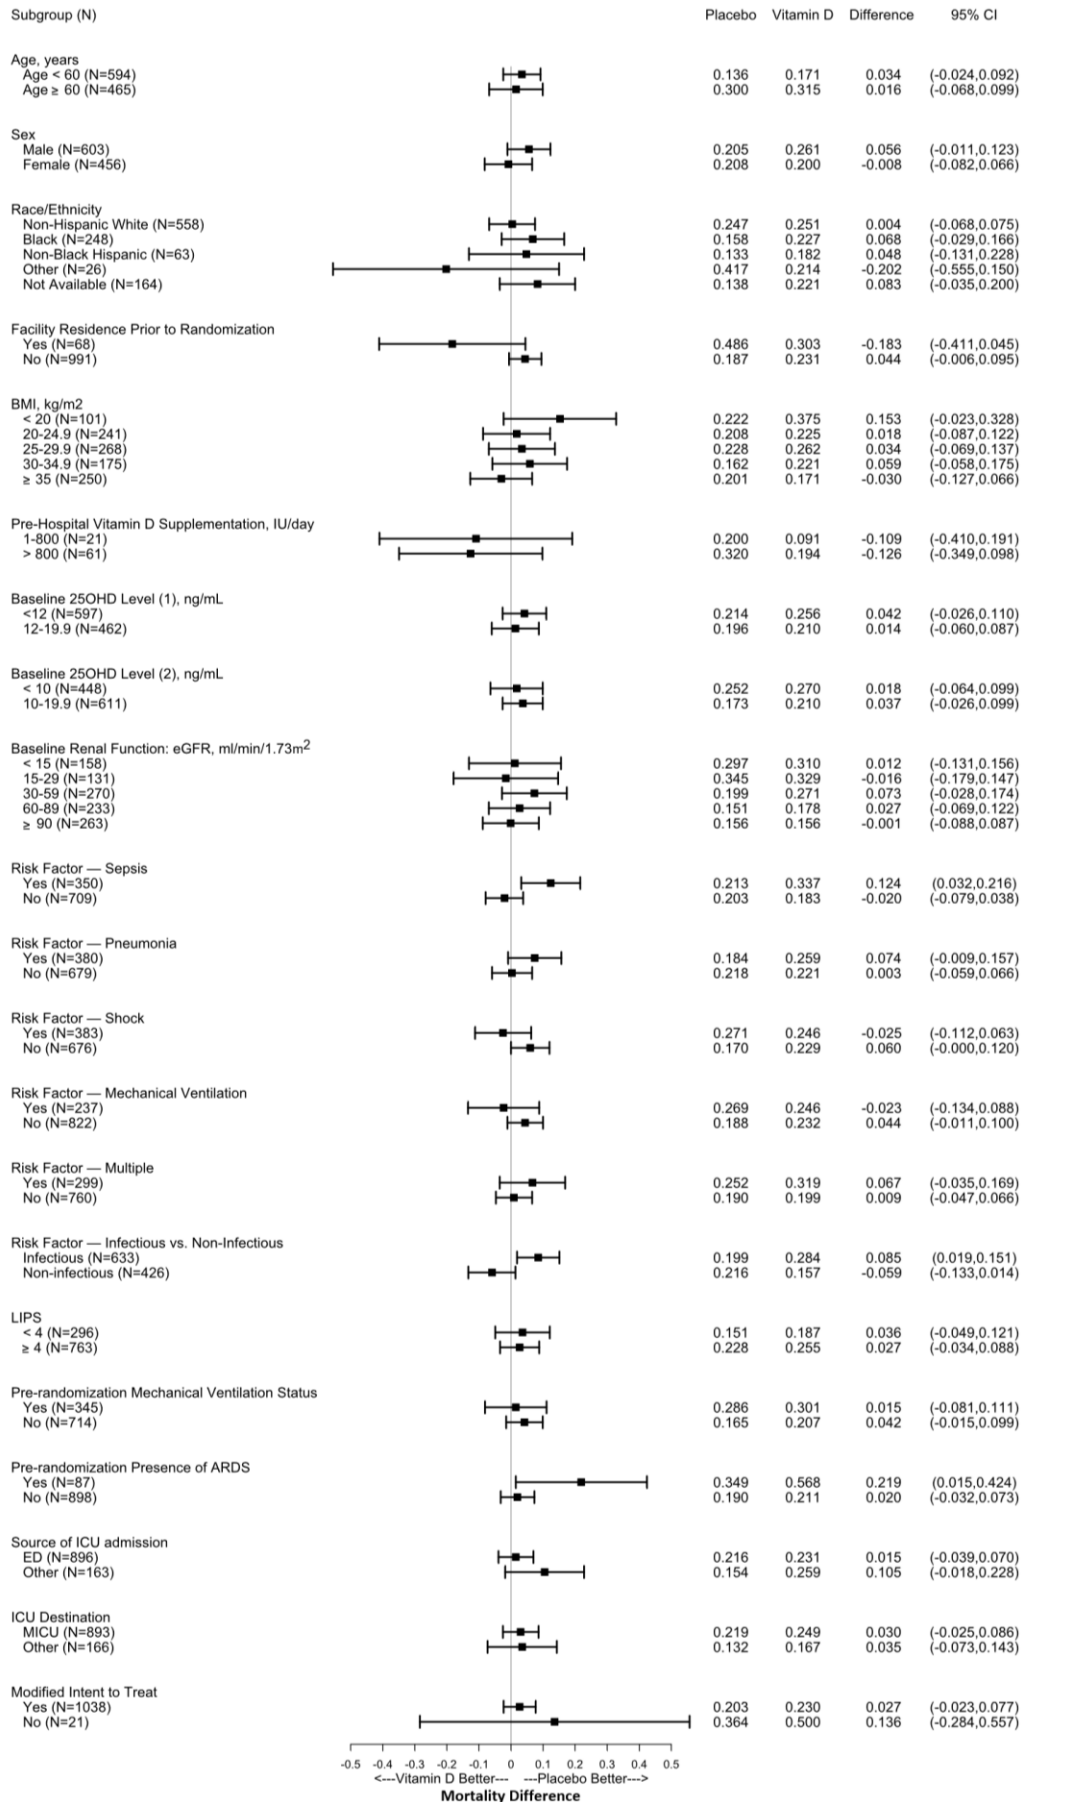

## B) All randomized

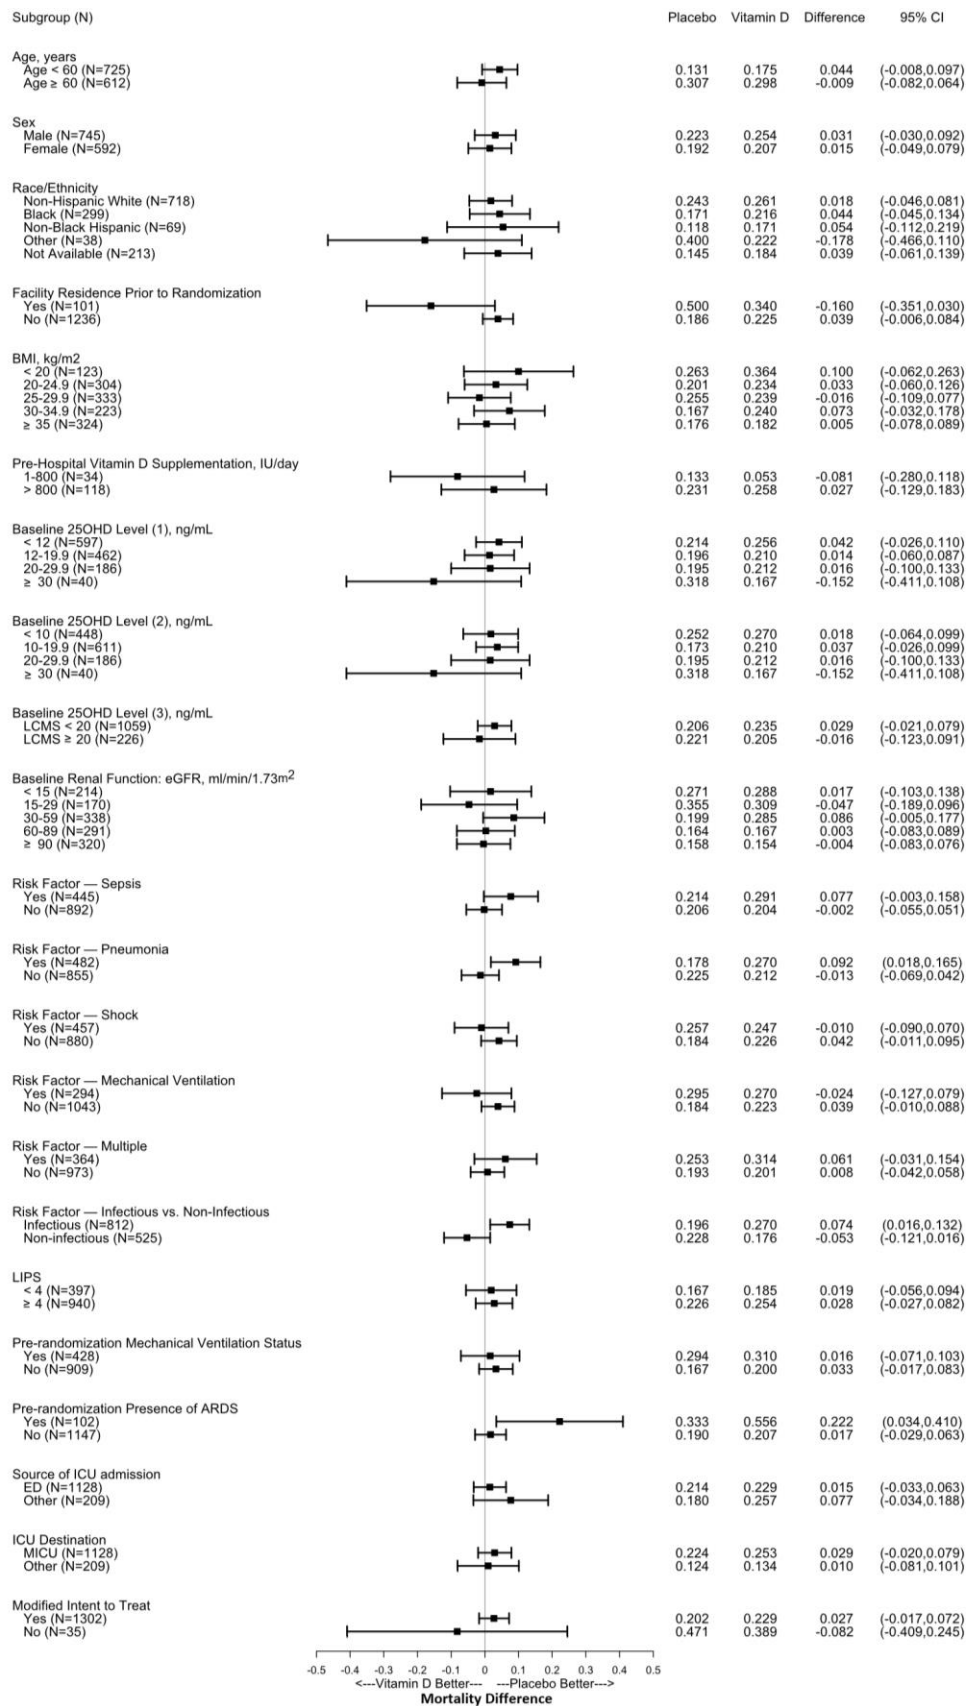

Error bars represent 95% confidence intervals. Plasma 25-hydroxyvitamin D concentrations measured by liquid chromatography-tandem mass spectrometry (LC/MS/MS). **Abbreviations:** BMI, body mass index; 25OHD, 25-hydroxyvitamin D; IU, international units; eGFR, estimated glomerular filtration rate; LIPS, lung injury prediction score; ARDS, acute respiratory distress syndrome; ICU, intensive care unit
